# Supplementary material
Source: MDPI journal article supplement (https://www.mdpi.com/2073-4395/14/3/624)
Supplement: s1 [file s1]

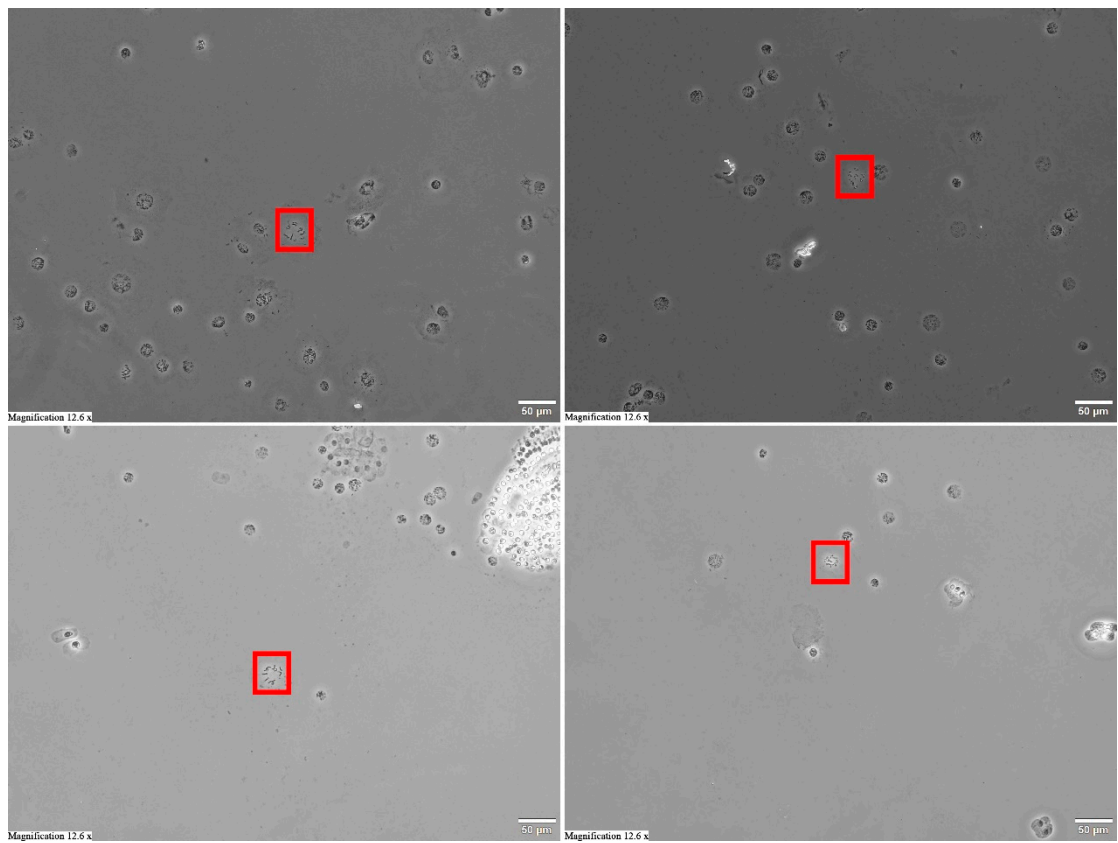

**Figure S1. Chromosome pressing to identify Maize haploid material.**

**Table S1. Genes and their basic information**

| Gene ID               | Chromosome | Protein                                      |
|-----------------------|------------|----------------------------------------------|
| <i>Zm00001d033112</i> | 1          | kinesin-associated protein 13                |
| <i>Zm00001d010525</i> | 8          | kinesin-like protein KIN-10C                 |
| <i>Zm00001d043386</i> | 3          | kinesin light chain LC6, flagellar outer arm |

**Table S2. Genes and their primers for qRT-PCR.**

| Gene                  | Primer sequence (5'-3')  |
|-----------------------|--------------------------|
| <i>ZmGAPDH</i>        | F: ATCAACGGCTTCGGAAGGAT  |
|                       | R: CCGTGGACGGTGTCGTACTT  |
| <i>Zm00001d033112</i> | F: GCTCTAGTTCAGCAGTACCTT |
|                       | R: GAATGGTTTTGGTGAGTCCTC |
| <i>Zm00001d010525</i> | F: GAGAGAACGCTAGCAATGGT  |
|                       | R: GCTCCATGCTTCAATAACGC  |
| <i>Zm00001d043386</i> | F: TGTTGGAAGGAAAGGCGGTG  |
|                       | R: TTCTTGATGTGGGACGCGAT  |

**Table S3. qRT- PCR reaction system.**

| Reagent            | Volume (μL) |
|--------------------|-------------|
| PCR Forward Primer | 0.2         |
| PCR Reverse Primer | 0.2         |
| Mix                | 5           |
| ddH <sub>2</sub> O | 3.6         |
| cDNA               | 1           |
| Total              | 10          |
